# Supplementary material for: Theoretical analysis and compensation for the joint effects of HPA nonlinearity and RF crosstalk in VBLAST MIMO-OFDM systems over Rayleigh fading channel
Source: Springer Nature journal article supplement (doi:10.1186/1687-1499-2014-61), 2014-04-22

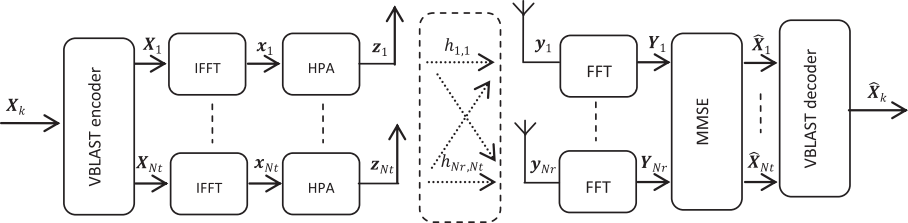

Supplement: 13638_2013_1044_MOESM1_ESM.pdf [file 13638_2013_1044_MOESM1_ESM.pdf]
