# Supplementary material for: Theoretical analysis and compensation for the joint effects of HPA nonlinearity and RF crosstalk in VBLAST MIMO-OFDM systems over Rayleigh fading channel
Source: Springer Nature journal article supplement (doi:10.1186/1687-1499-2014-61), 2014-04-22
Supplement: 13638_2013_1044_MOESM13_ESM.pdf [file 13638_2013_1044_MOESM13_ESM.pdf]

| IBO<br>(dB) | Simulation     |              | Analytical method |              |
|-------------|----------------|--------------|-------------------|--------------|
|             | $K_0$          | $\sigma_d^2$ | $K_0$             | $\sigma_d^2$ |
| 4           | 0.5556+0.2152i | 0.0142       | 0.5560+0.2152i    | 0.0142       |
| 6           | 0.6625+0.1953i | 0.0074       | 0.6627+0.1953i    | 0.0074       |
| 8           | 0.7556+0.1643i | 0.0034       | 0.7560+0.1641i    | 0.0033       |
| 10          | 0.8304+0.1287i | 0.0013       | 0.8302+0.1288i    | 0.0013       |

Table 1. Comparison of analytical and simulation results of  $K_0$  and  $\sigma_d^2$  for different values of  $IBO, L = 10$  and Saleh's model.
